# Supplementary material for: Protein interaction sentence detection using multiple semantic kernels
Source: Springer Nature journal article supplement (doi:10.1186/2041-1480-2-1), 2011-01-01
Supplement: 13326_2010_37_MOESM3_ESM.pdf [file 13326_2010_37_MOESM3_ESM.pdf]

Given an example corpus:

A cat sat on the mat.

The dog chased the cat.

The co-occurrence matrix is:

|        | cat | sat | mat | dog | chased |
|--------|-----|-----|-----|-----|--------|
| cat    | 0   | 1   | 1   | 1   | 1      |
| sat    | 1   | 0   | 1   | 0   | 0      |
| mat    | 1   | 1   | 0   | 0   | 0      |
| dog    | 1   | 0   | 0   | 0   | 1      |
| chased | 1   | 0   | 0   | 1   | 0      |
