# Supplementary material for: Protein interaction sentence detection using multiple semantic kernels
Source: Springer Nature journal article supplement (doi:10.1186/2041-1480-2-1), 2011-01-01
Supplement: 13326_2010_37_MOESM4_ESM.pdf [file 13326_2010_37_MOESM4_ESM.pdf]

Given an example corpus:

A cat sat on the mat.

The dog chased the cat.

Ignoring the stopwords:

cat sat mat dog chased cat

The window of length  $L = 5$  and the target word cat:

|                        |       |
|------------------------|-------|
| cat sat mat dog chased | t:cat |
|------------------------|-------|

The matrix  $H$  constructed by passing the window across text:

|        | cat | sat | mat | dog | chased |
|--------|-----|-----|-----|-----|--------|
| cat    | 1   | 5   | 4   | 3   | 2      |
| sat    | 2   | 0   | 5   | 4   | 3      |
| mat    | 3   | 0   | 0   | 5   | 4      |
| dog    | 4   | 0   | 0   | 0   | 5      |
| chased | 5   | 0   | 0   | 0   | 0      |

The matrix  $H + H^T$ :

|        | cat | sat | mat | dog | chased |
|--------|-----|-----|-----|-----|--------|
| cat    | 2   | 7   | 7   | 7   | 7      |
| sat    | 7   | 0   | 5   | 4   | 3      |
| mat    | 7   | 5   | 0   | 5   | 4      |
| dog    | 7   | 4   | 5   | 0   | 5      |
| chased | 7   | 3   | 4   | 5   | 0      |
