# Supplementary material for: Protein interaction sentence detection using multiple semantic kernels
Source: Springer Nature journal article supplement (doi:10.1186/2041-1480-2-1), 2011-01-01

Gaussian Kernel Parameter Tuning Examples

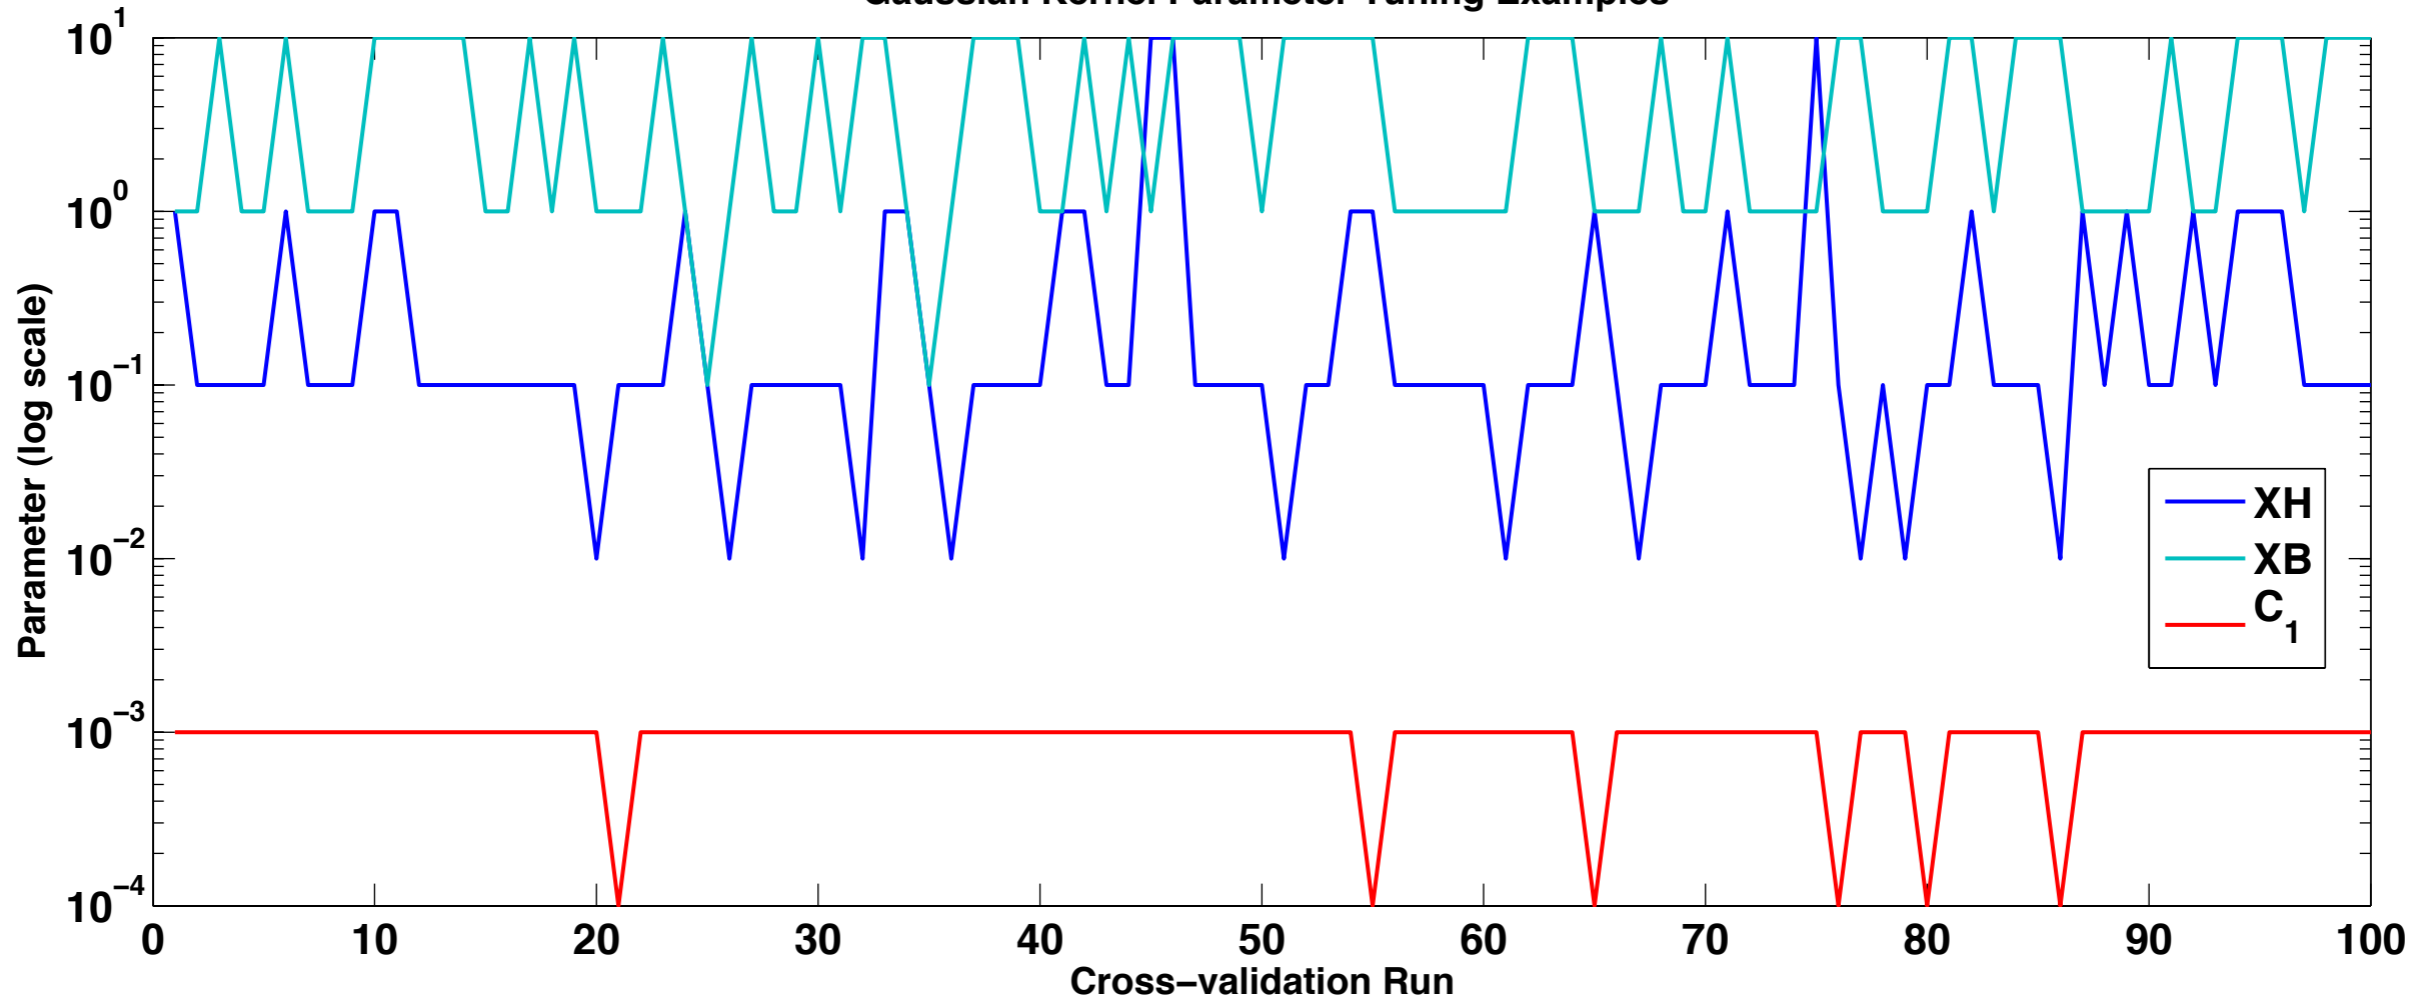

Supplement: 13326_2010_37_MOESM6_ESM.pdf [file 13326_2010_37_MOESM6_ESM.pdf]
